# Supplementary material for: Identification of small molecules that disrupt vacuolar function in the pathogen Candida albicans
Source: PubMed Central journal article supplement (PMC5289544; doi:10.1371/journal.pone.0171145), 2017-02-02

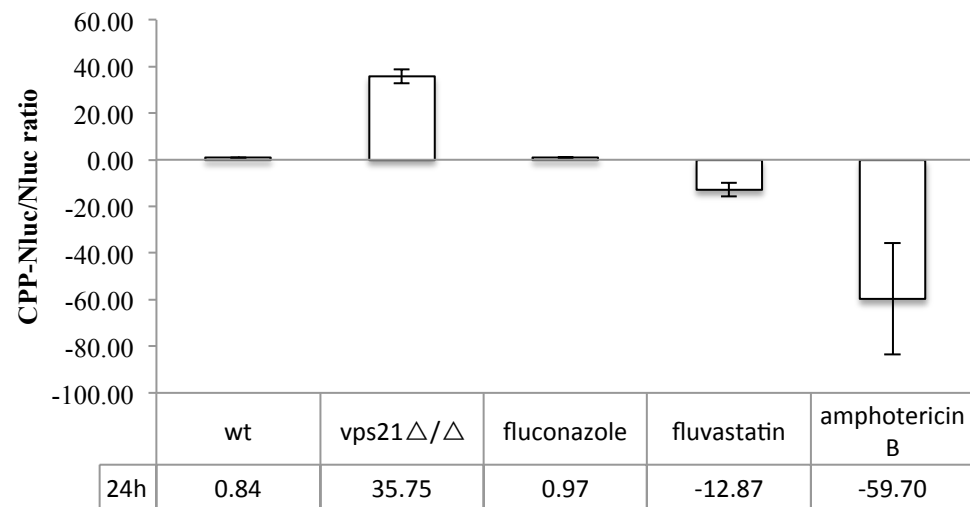

Supplement: pone.0171145.s002.pdf [file pone.0171145.s002.pdf]
