# Supplementary material for: Identification of small molecules that disrupt vacuolar function in the pathogen Candida albicans
Source: PubMed Central journal article supplement (PMC5289544; doi:10.1371/journal.pone.0171145), 2017-02-02
Supplement: pone.0171145.s004.pdf [file pone.0171145.s004.pdf]

| Primer           | Sequence (5' to 3')                                                                            |
|------------------|------------------------------------------------------------------------------------------------|
| mChORFF-EagI     | TCAC <u>CGGCCG</u> GATGGTTTCAAAAGGTGAAGAAG                                                     |
| mChORFR-MluI     | TCA <u>ACGCGT</u> TTATTTATATAATTCATCCATACCACC                                                  |
| ACT1prF-BamI     | TCATCAGGAT <u>CCCCAGCCT</u> CGTTTATAATAAACTTAGTC                                               |
| ADH1-3'UTRR-ApaI | TCATCAGGG <u>CCCATCAAT</u> GCCAGAGATCAAACC                                                     |
| YPT72DISF        | AACGATACAGAGTTTAATTTAATTTAATTCAATTCAATTTAATTA<br>ATTAATCATATACACTTAATTTTCATGTGGAATTGTGAGCGGATA |
| YPT72DISR        | AAACGAATTCGTGATATCTATTTGTTCTCTTTCTTCACCTGTGTA<br>TTTGAAATTGATTGTTATATTATTATTTCCCAGTCACGACGTT   |
| YPT72AMPR2       | TCATCAGGATCCATTA <sup>AAA</sup> ACTGGTAATGATTTGG                                               |
| YPT72DETF        | TGTTGCATTTTATCGAGGGGC                                                                          |
| YPT72DETR        | CAGGCACTCGCCTCCGAGTCC                                                                          |
| VPS11DISF        | TTCTCCTTCGAGGACAATATCATCTCCTCTATTATCATTATCATCA<br>TGGAGACAGTTCCAATTGTTTGATTGTGGAATTGTGAGCGGATA |
| VPS11DISR        | CTATTGATCTTCCATTACACCTTTACCAATATAATCAGAAACAAA<br>TTTAAATTTATCATTACTAGAATGCTTTCCCAGTCACGACGTT   |
| VPS11AMPR2       | TCAGGATCCAAATTACTGCATGAGAACACC                                                                 |
| VPS11DETF3       | GTAGTGGTACAACAGGAATCGG                                                                         |
| VPS11DETR3       | GATTTATCAATGCCATGATCGG                                                                         |
| URA3INTF2        | TTATACCATCCAAATCCCGCG                                                                          |
| LUXINTDETF       | CTGACCTTTAGTCTTTCTGCG                                                                          |

|            |                                  |
|------------|----------------------------------|
| LUXINTDETR | CAGTAGTACTT <u>GTTGTT</u> GTATCG |
|------------|----------------------------------|

Engineered restriction sites are underlined.
