# Supplementary material for: Identification of small molecules that disrupt vacuolar function in the pathogen Candida albicans
Source: PubMed Central journal article supplement (PMC5289544; doi:10.1371/journal.pone.0171145), 2017-02-02
Supplement: pone.0171145.s005.pdf [file pone.0171145.s005.pdf]

| Strain                | Parent strain | Relevant Genotype                                                                                                                    | Reference  |
|-----------------------|---------------|--------------------------------------------------------------------------------------------------------------------------------------|------------|
| SC5314                |               | Wild type                                                                                                                            | (1)        |
| CAI4                  | SC5314        | <i>ura3Δ:imm434/ura3Δ:imm434</i><br><i>iro1Δ:imm434/iro1Δ:imm434</i>                                                                 | (2)        |
| CAI8                  | CAI4          | <i>ura3Δ:imm434/ura3Δ:imm434</i><br><i>iro1Δ:imm434/iro1Δ:imm434</i><br><i>ade2:hisG/ade2:hisG</i>                                   | (2)        |
| CAI8 + pLUX           | CAI8          | <i>ade2Δ:hisG/ade2::hisG</i><br><i>ura3Δ/ura3Δ:URA3-IRO1</i>                                                                         | This study |
| BWP17                 | CAI4          | <i>ura3Δ:imm434/ura3Δ:imm434</i><br><i>iro1Δ:imm434/iro1Δ:imm434</i><br><i>his1Δ:hisG/his1Δ:hisG</i><br><i>arg4Δ:hisG/arg4Δ:hisG</i> | (3)        |
| C8vps11Δ/Δ            | CAI8          | <i>ade2:hisG/ade2:hisG</i><br><i>vps11Δ:dpl200/vps11Δ: dpl200</i><br><i>ura3Δ/ura3Δ:URA3-IRO1</i>                                    | This study |
| C8ypt72Δ/Δ            | CAI8          | <i>ade2:hisG/ade2:hisG</i><br><i>ypt72Δ:dpl200/ypt72Δ: dpl200</i><br><i>ura3Δ/ura3Δ:URA3-IRO1</i>                                    | This study |
| YH1                   | BWP17         | <i>ura3Δ/ura3Δ:URA3-IRO1 his1Δ/Δ</i><br><i>arg4Δ/Δ ypt72Δ:ARG4/ypt72Δ:HIS1</i>                                                       | (4)        |
| YR1                   | BWP17         | <i>ura3Δ/ura3Δ:URA3-IRO1-YPT72</i><br><i>his1Δ/Δ arg4Δ/Δ ypt72Δ:ARG4/</i><br><i>ypt72Δ:HIS1</i>                                      | (4)        |
| GPH1                  | BWP17         | <i>ura3Δ/ura3Δ arg4Δ/arg4Δ</i><br><i>his1Δ/his1Δ:pGEMHIS1</i><br><i>vps11Δ:ARG4/vps11Δ:URA3</i>                                      | (5)        |
| GPR1                  | BWP17         | <i>ura3Δ/ura3Δ arg4Δ/arg4Δ</i><br><i>his1Δ/his1Δ:pGEMHIS1-VPS11</i><br><i>vps11Δ:ARG4/vps11Δ:URA3</i>                                | (5)        |
| CAI4 + pKE1-NLUC      | CAI4          | <i>ura3Δ/ura3Δ:pNLUC-URA3-IRO1</i>                                                                                                   | (6)        |
| CAI4 + pKE1-CPP-NLUC  | CAI4          | <i>ura3Δ/ura3ΔpCPP-NLUC-URA3-IRO1</i>                                                                                                | (6)        |
| CAI4 + pKE1-GFP-YPT72 | CAI4          | <i>ura3Δ/ura3ΔpGFP-YPT72-URA3-IRO1</i>                                                                                               | (7)        |
| GP100                 | BWP17         | <i>ura3Δ/ura3Δ:pKE1-mCh-URA3-IRO1</i><br><i>his1Δ/his1Δ:pKE2-GFP-YPT72-HIS1</i><br><i>arg4Δ/arg4Δ:pRSARG4ΔSpeI</i>                   | This study |

1. **Gillum AM, Tsay EY, Kirsch DR.** 1984. Isolation of the *Candida albicans* gene for orotidine-5'-phosphate decarboxylase by complementation of *S. cerevisiae* *ura3* and *E. coli* *pyrF* mutations. *Mol Gen Genet* **198**:179-182.
2. **Fonzi WA, Irwin MY.** 1993. Isogenic strain construction and gene mapping in *Candida albicans*. *Genetics* **134**:717-728.
3. **Wilson RB, Davis D, Mitchell AP.** 1999. Rapid hypothesis testing with *Candida albicans* through gene disruption with short homology regions. *J Bacteriol* **181**:1868-1874.

4. **Johnston DA, Eberle KE, Sturtevant JE, Palmer GE.** 2009. Role for endosomal and vacuolar GTPases in *Candida albicans* pathogenesis. *Infect Immun* **77**:2343-2355.
5. **Palmer GE, Cashmore A, Sturtevant J.** 2003. *Candida albicans* VPS11 is required for vacuole biogenesis and germ tube formation. *Eukaryot Cell* **2**:411-421.
6. **Luna-Tapia A, Peters BM, Eberle KE, Kerns ME, Foster TP, Marrero L, Noverr MC, Fidel PL, Jr., Palmer GE.** 2015. ERG2 and ERG24 Are Required for Normal Vacuolar Physiology as Well as *Candida albicans* Pathogenicity in a Murine Model of Disseminated but Not Vaginal Candidiasis. *Eukaryot Cell* **14**:1006-1016.
7. **Luna-Tapia A, Kerns ME, Eberle KE, Jursic BS, Palmer GE.** 2015. Trafficking through the late endosome significantly impacts *Candida albicans* tolerance of the azole antifungals. *Antimicrob Agents Chemother* **59**:2410-2420.
